# Supplementary material
Source: PubMed Central journal article supplement (PMC151393)

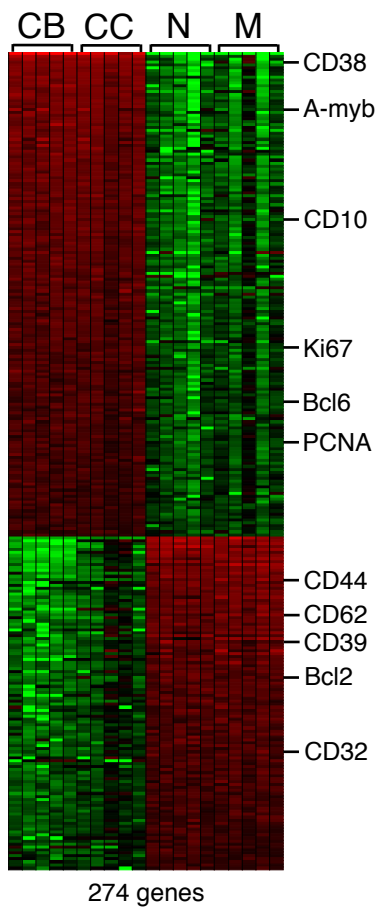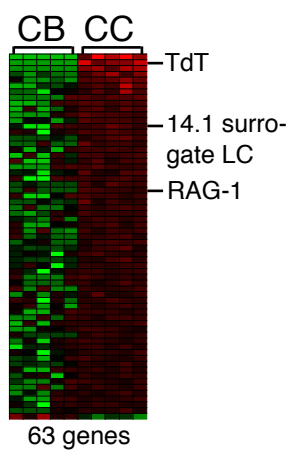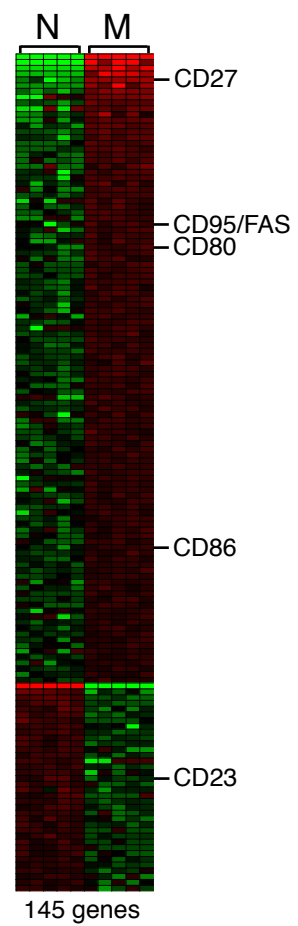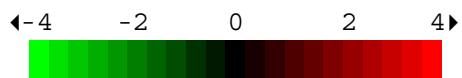

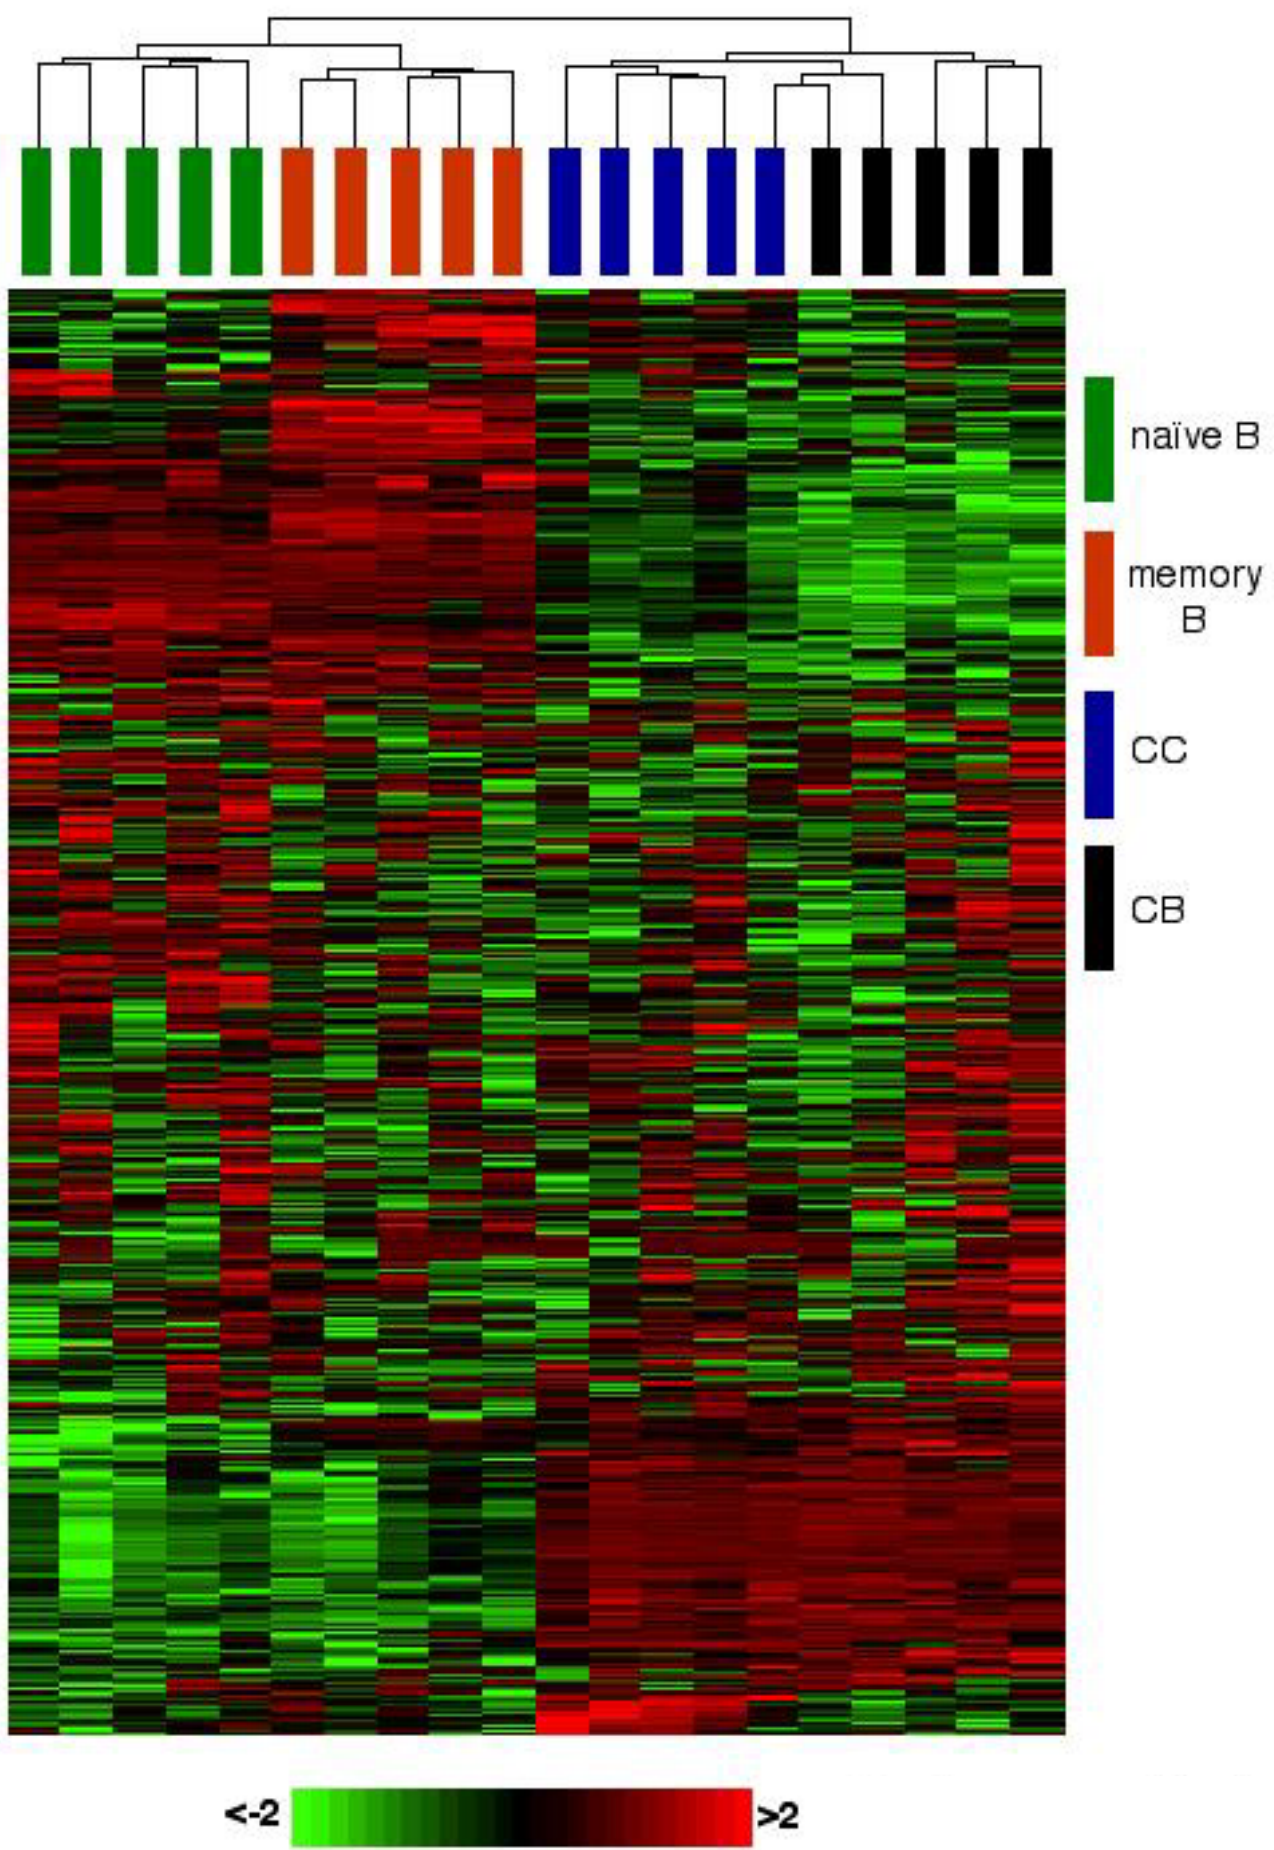

Supplement: pnas_0437996100_4.pdf [file pnas_0437996100_4.pdf]

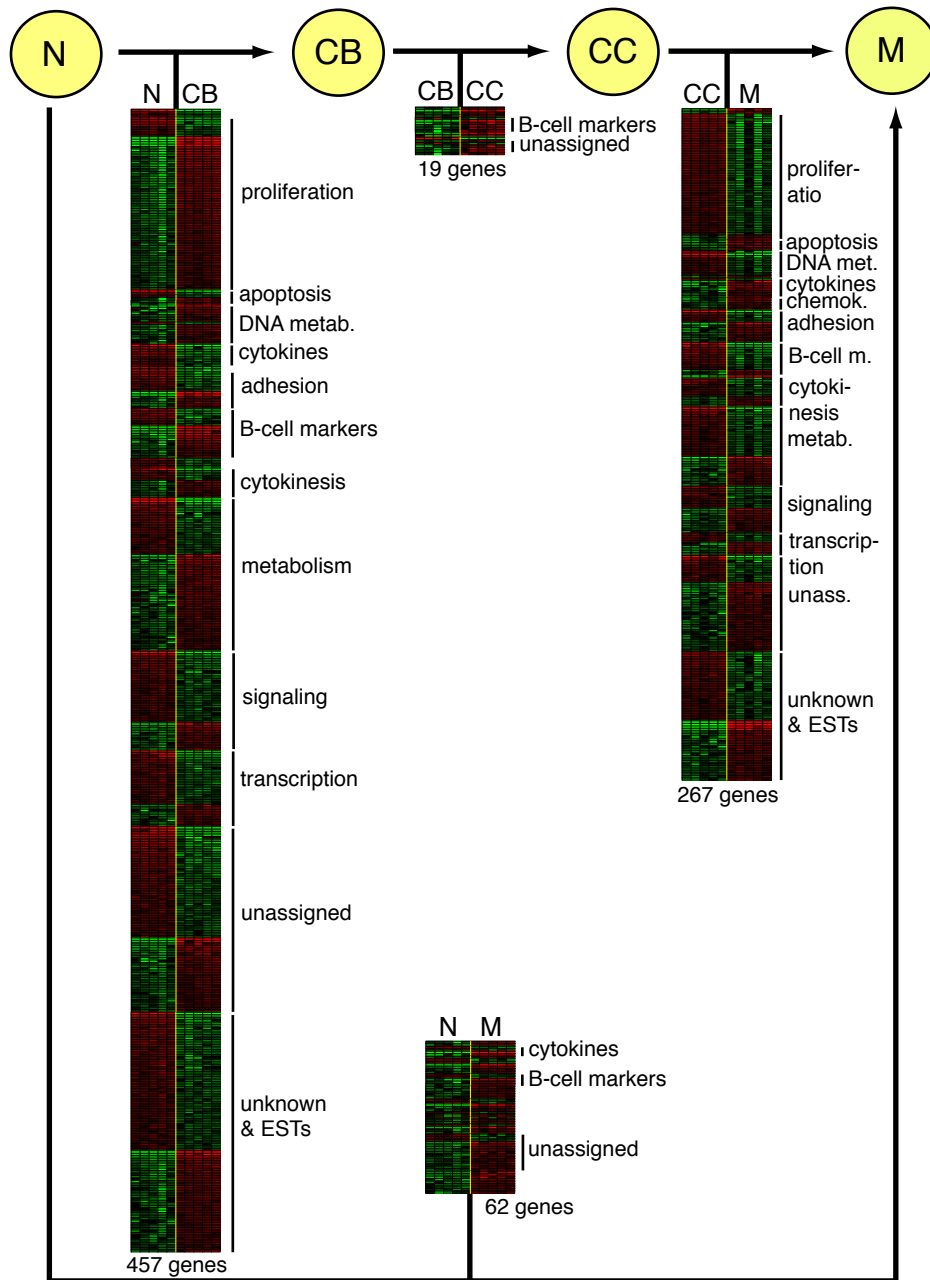

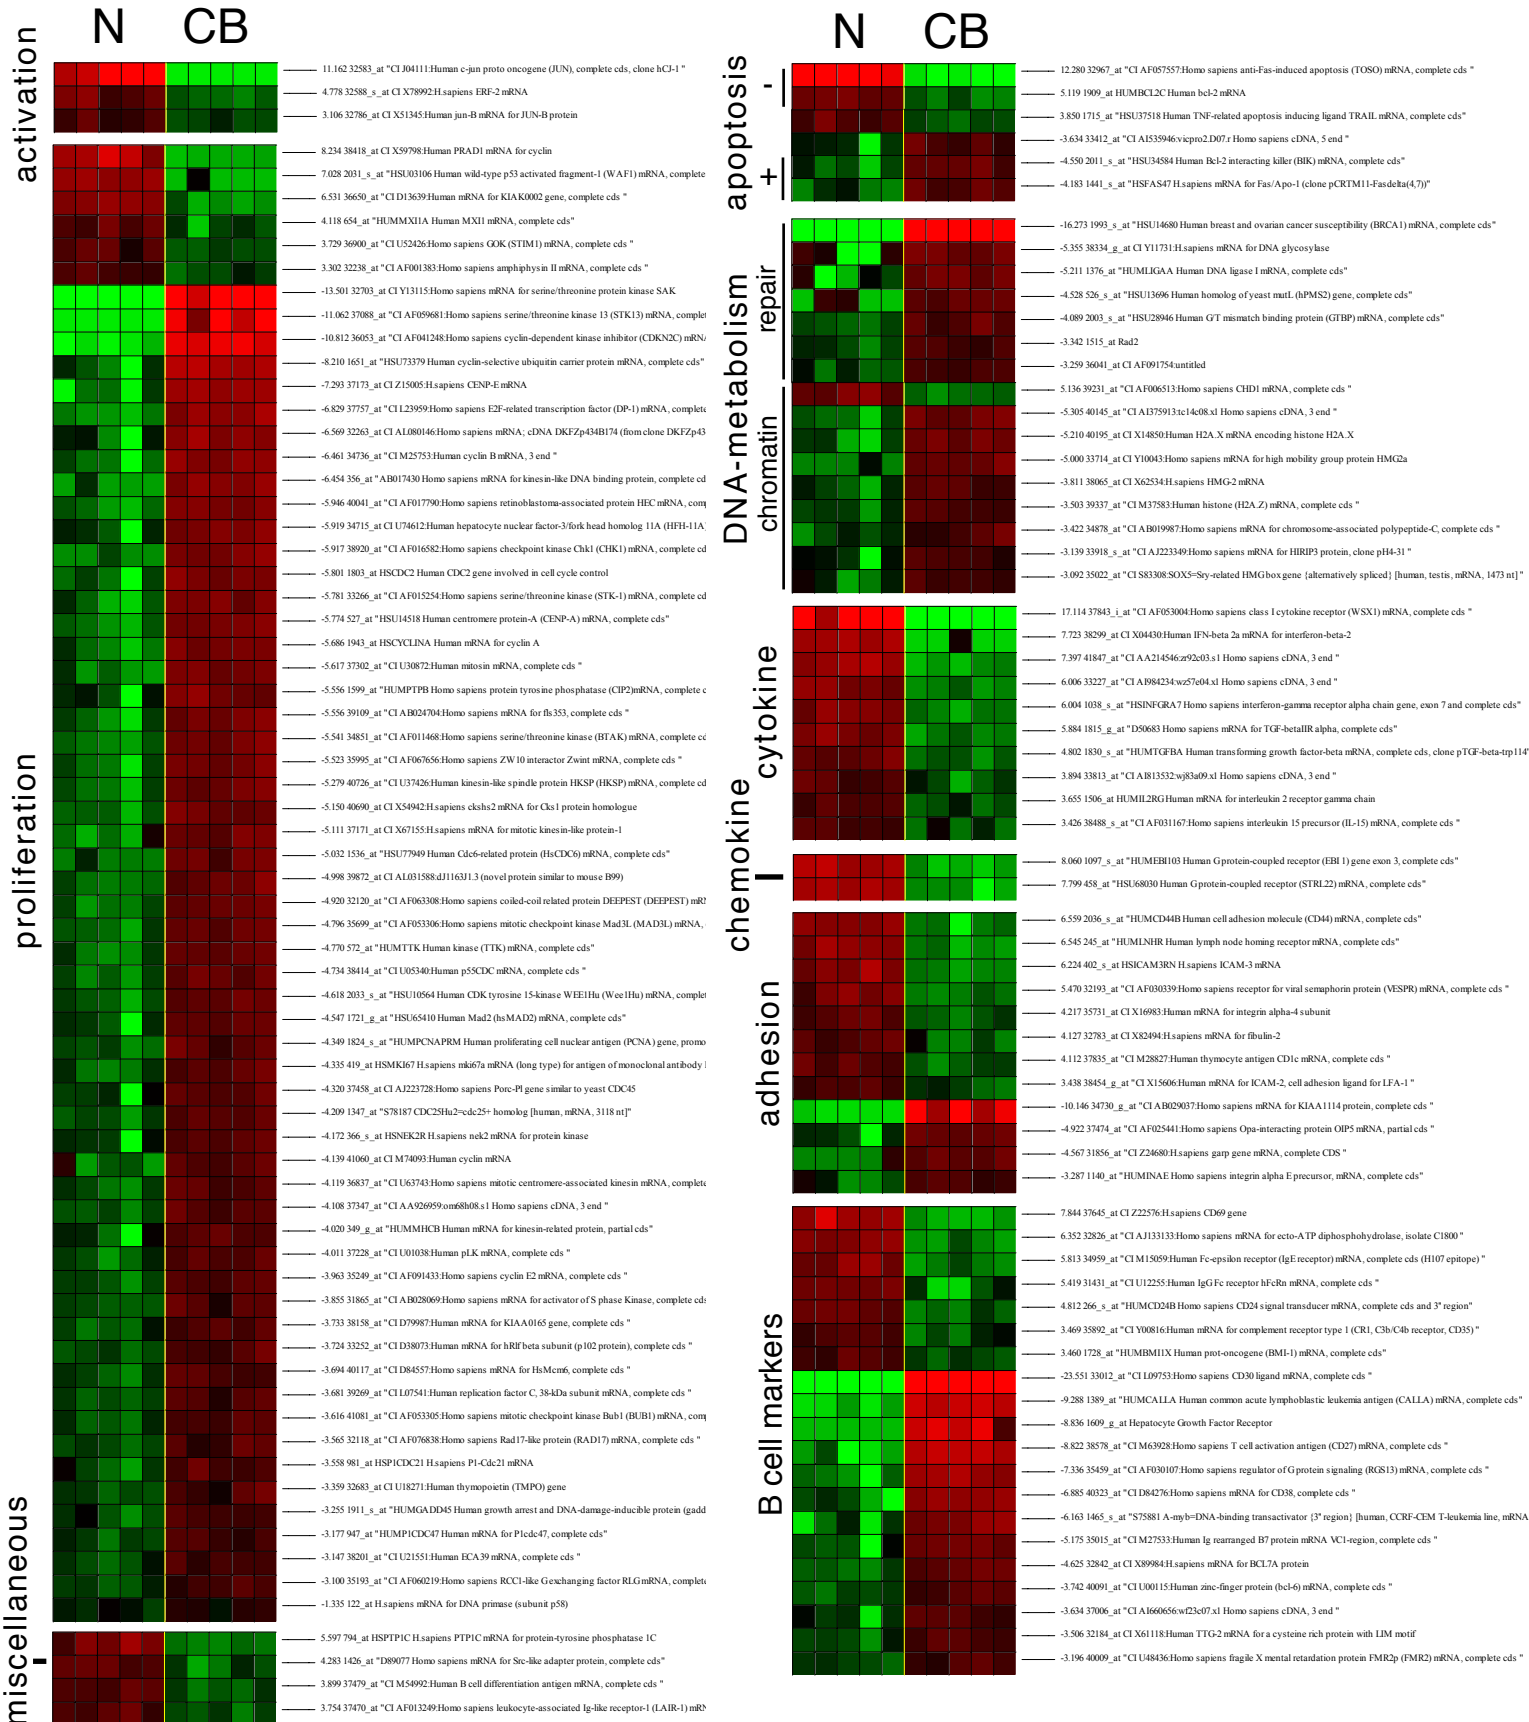

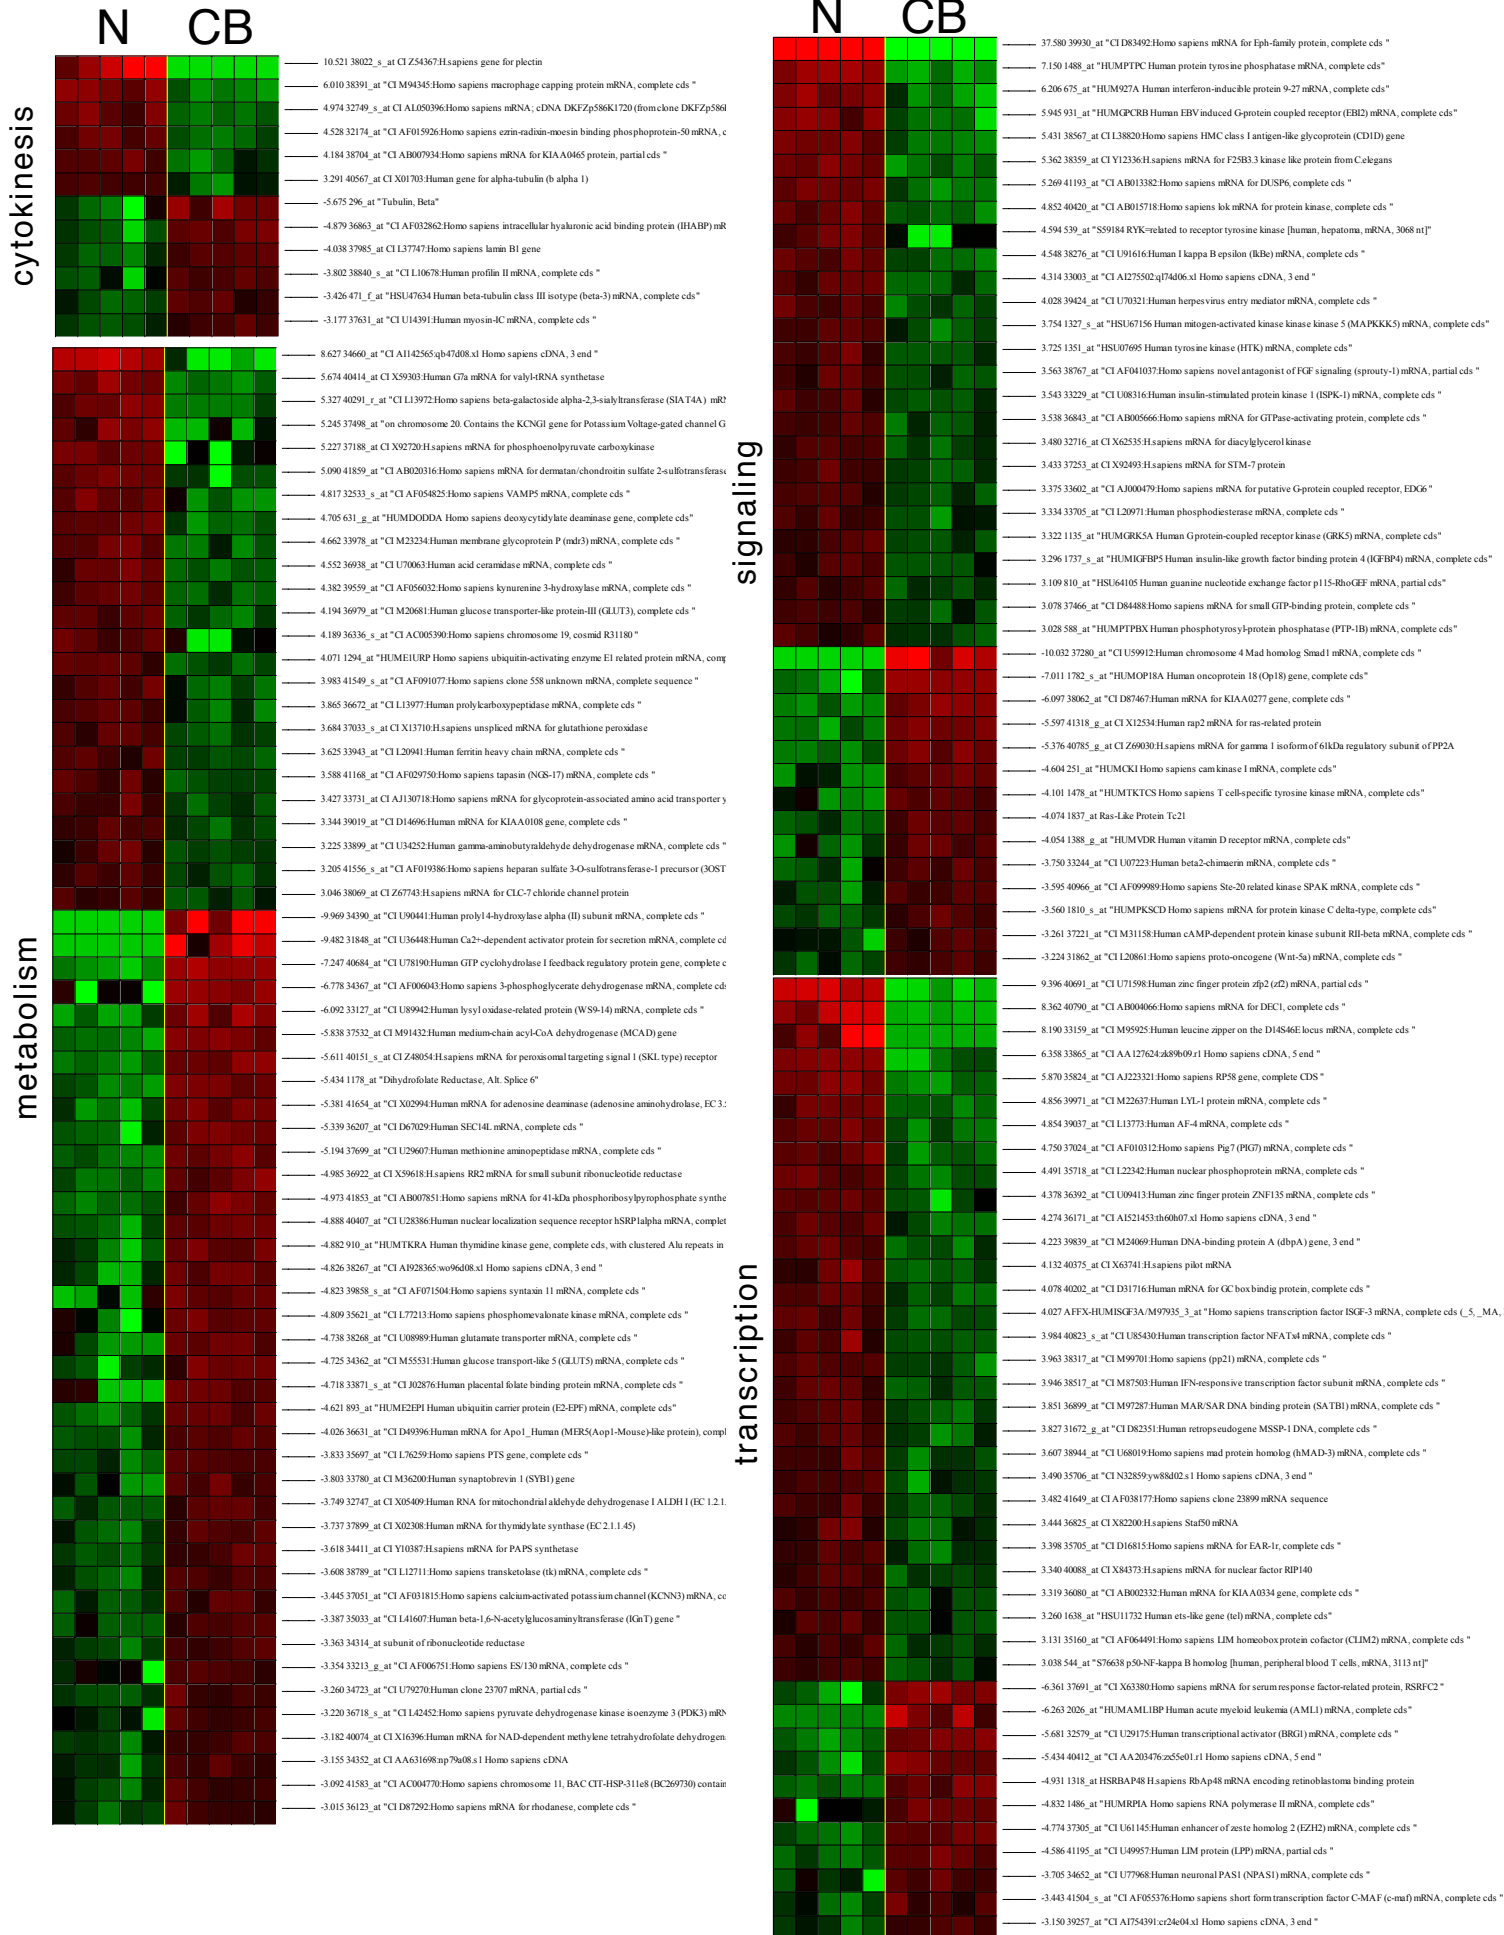

N CB

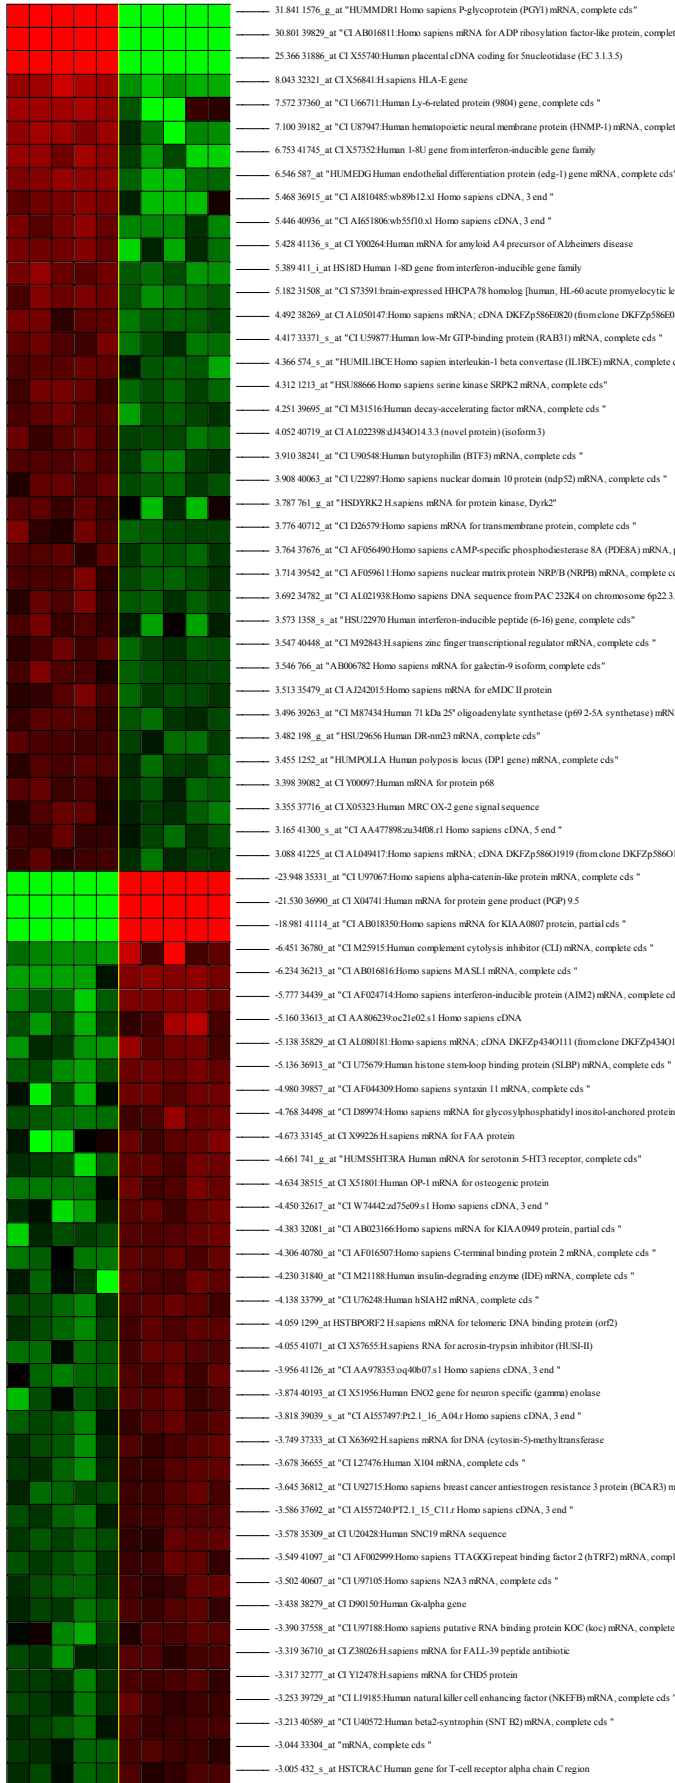

N CB

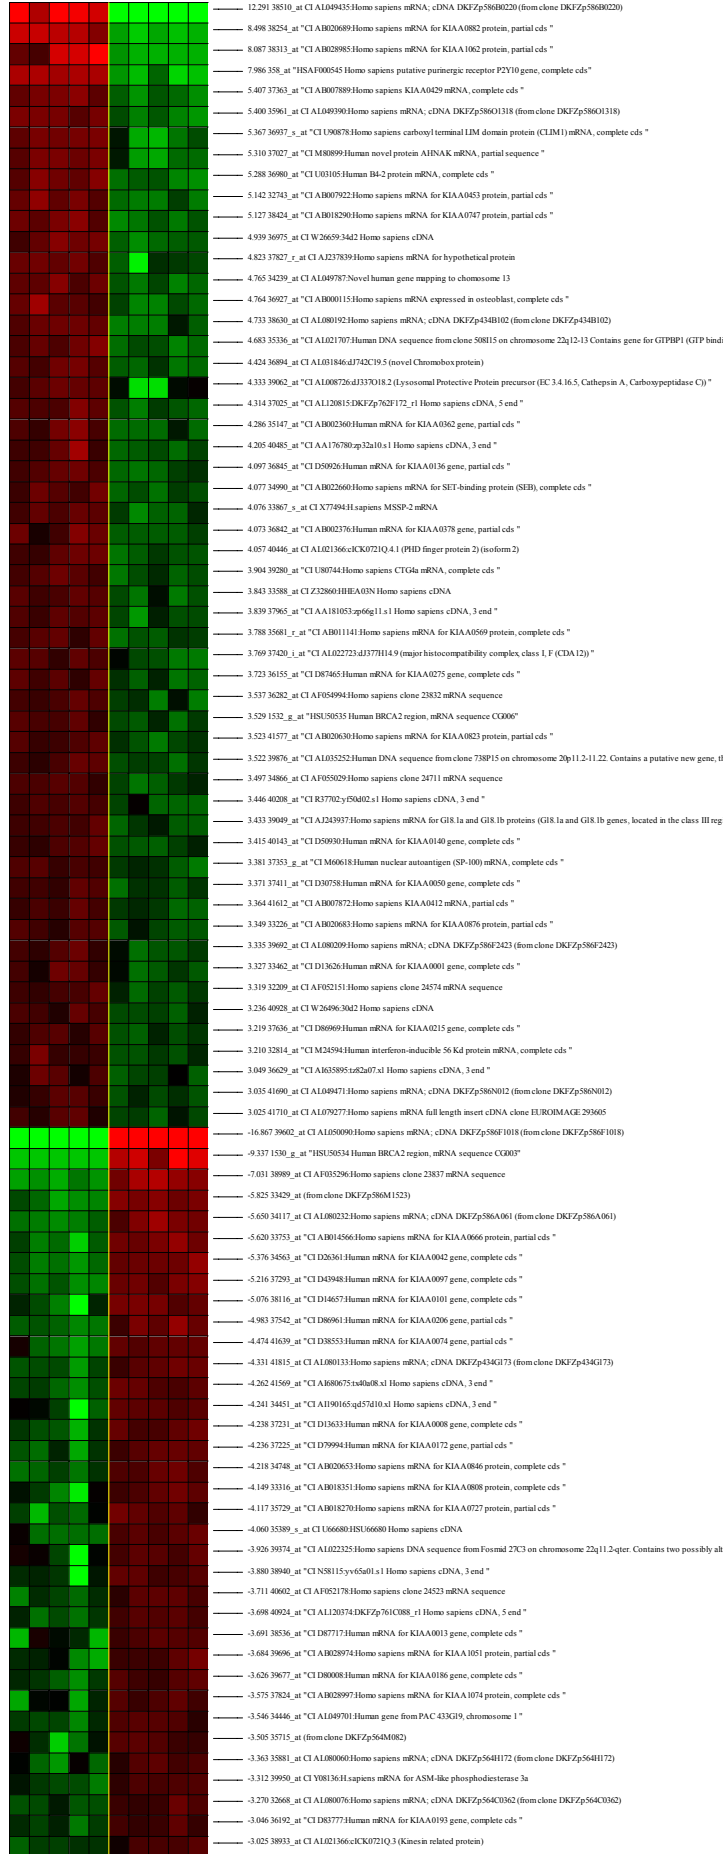

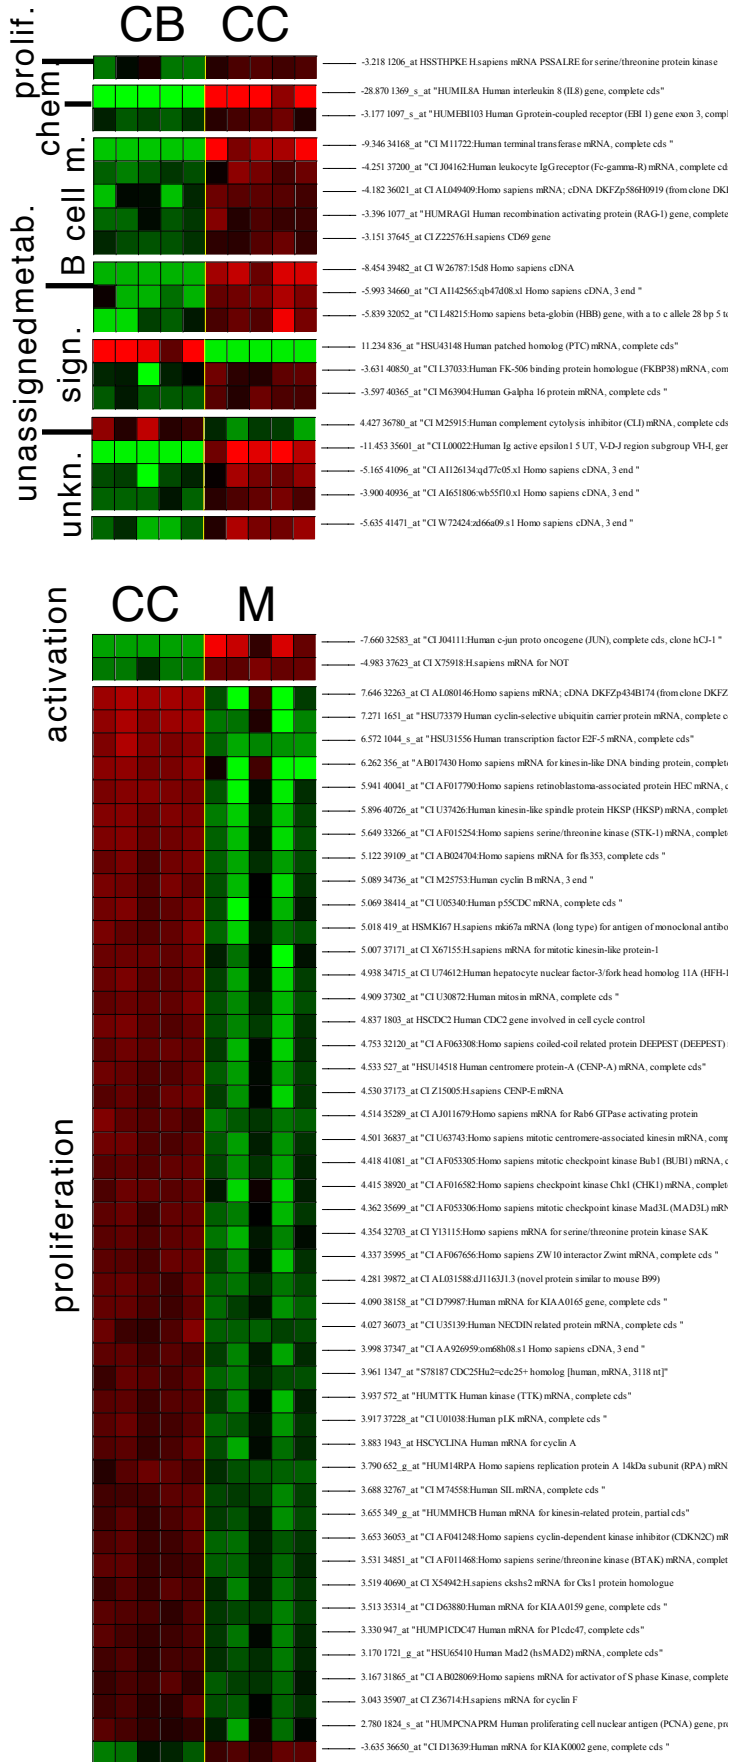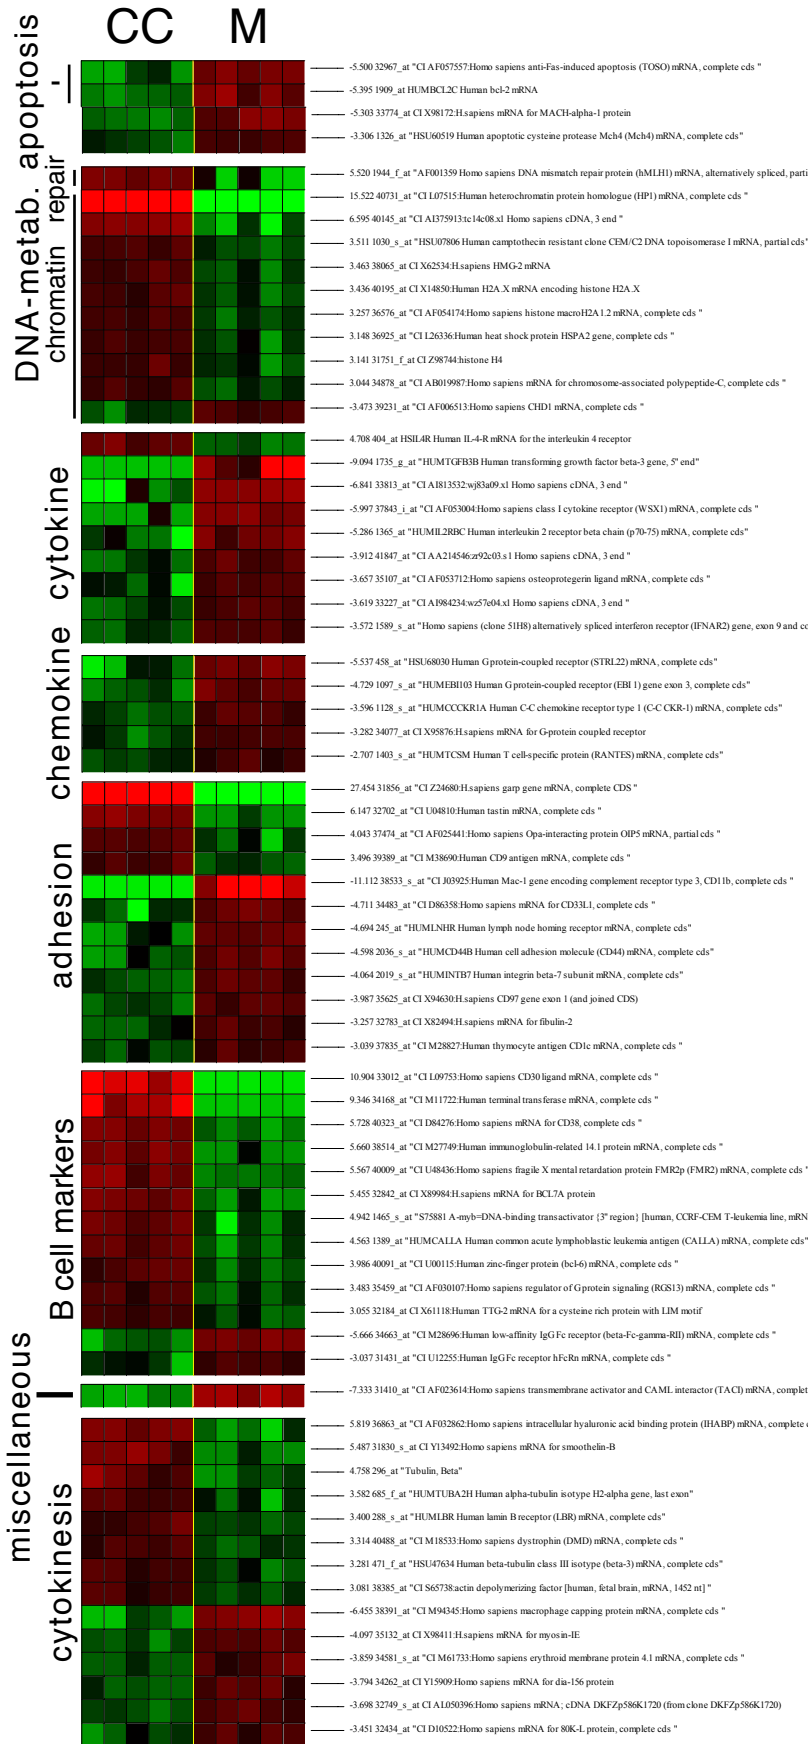

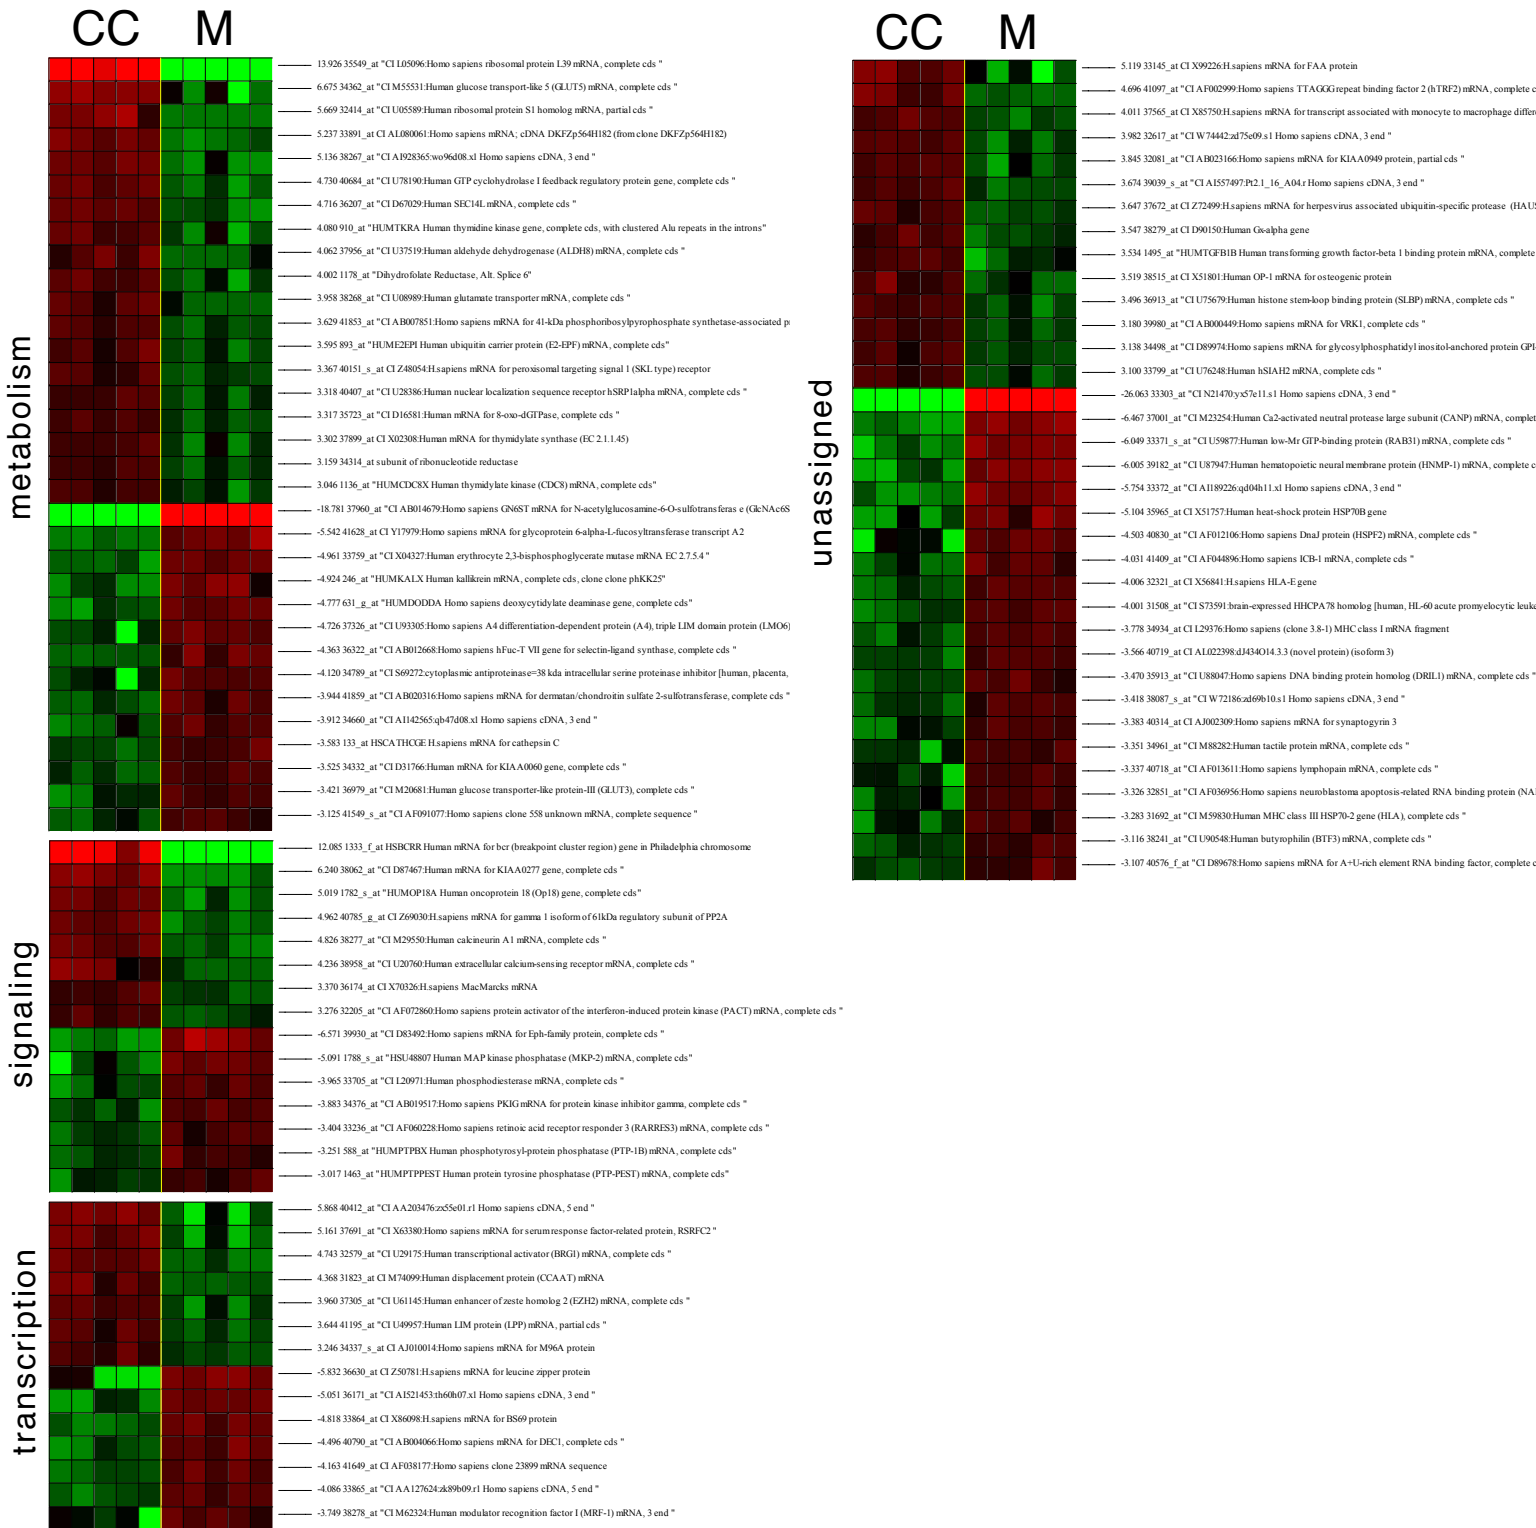

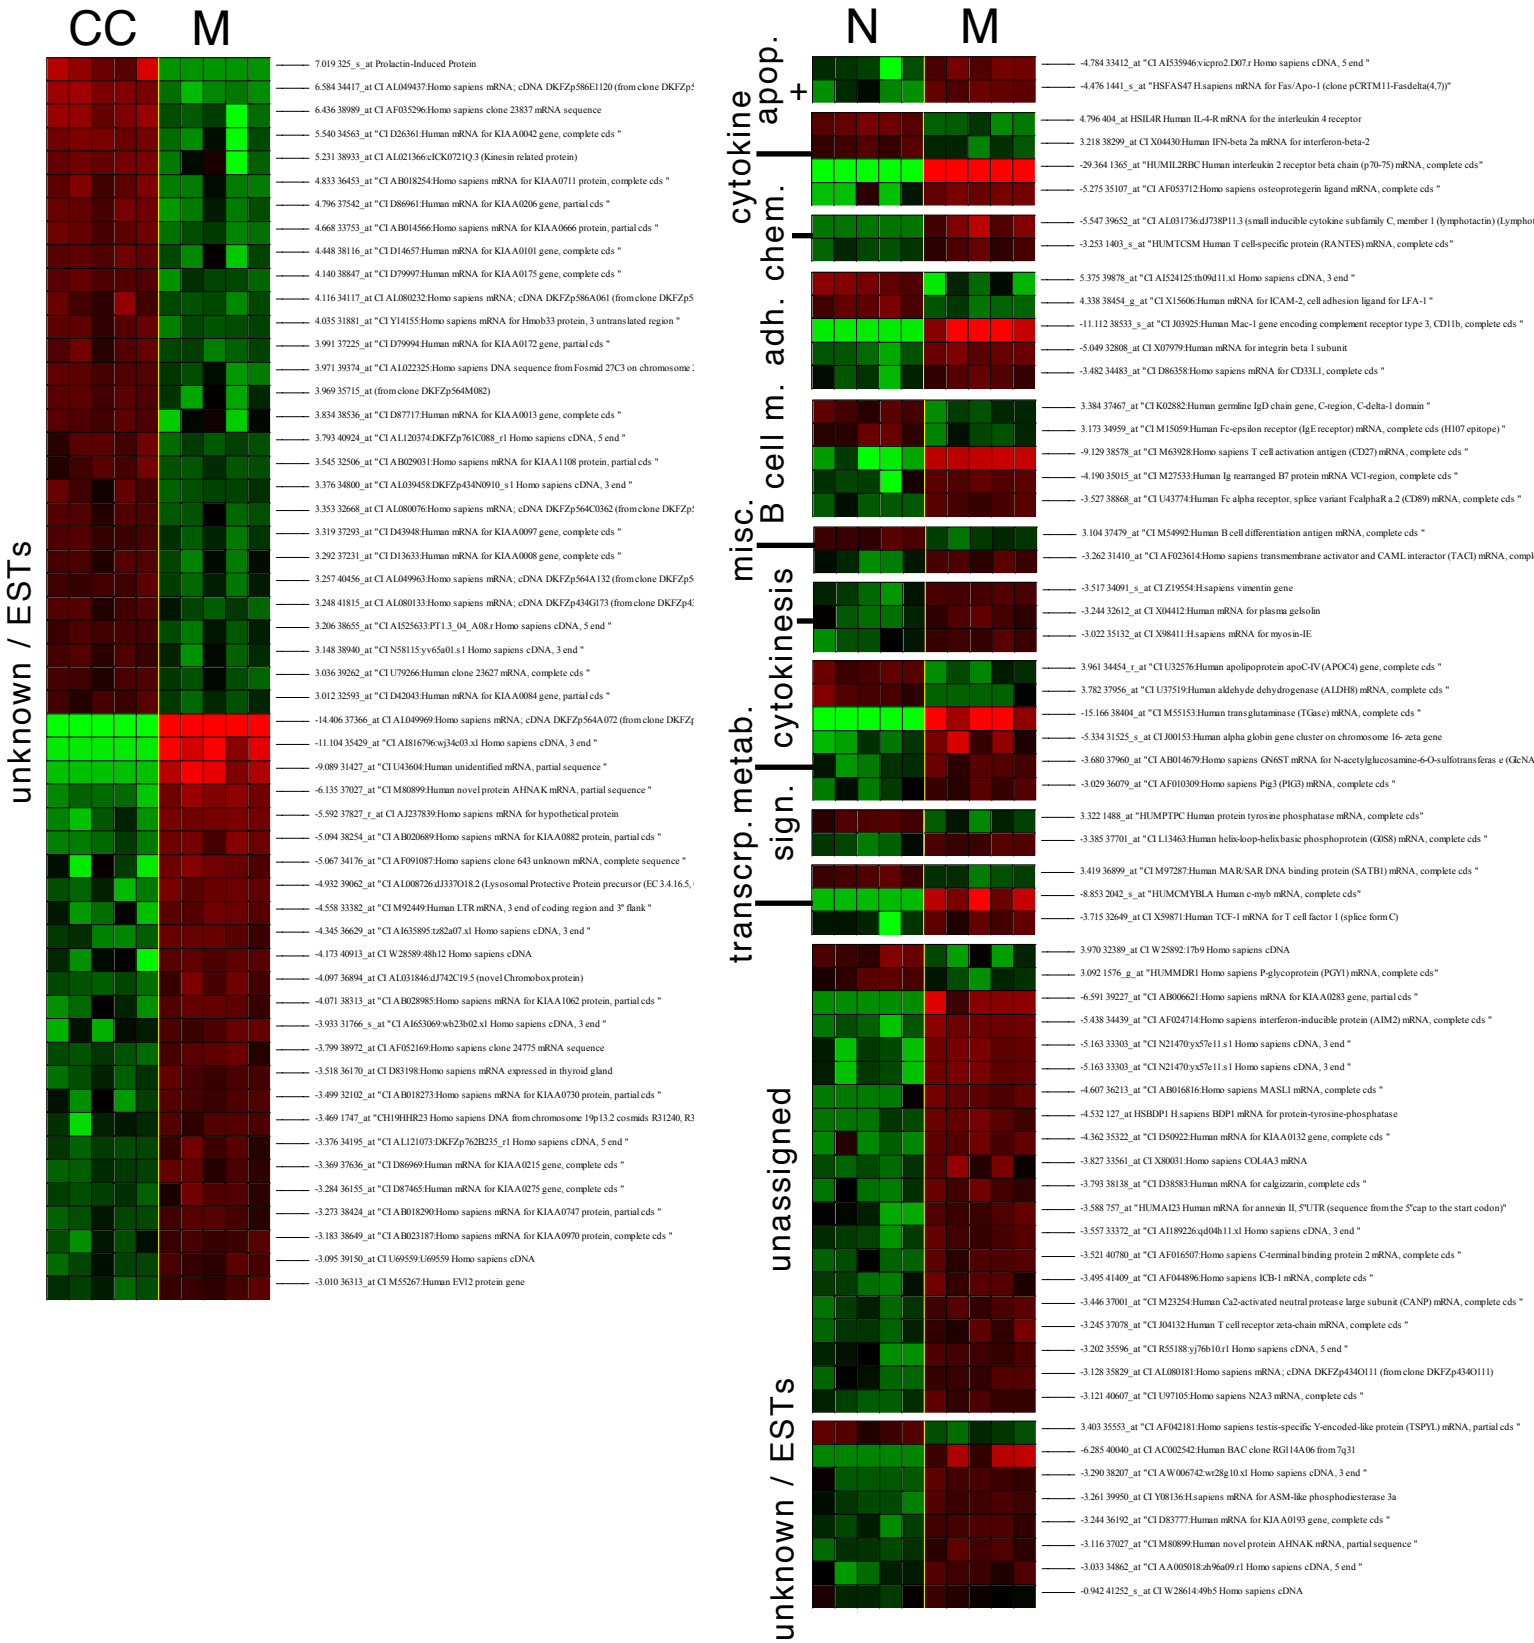

Supplement: pnas_0437996100_6.pdf [file pnas_0437996100_6.pdf]

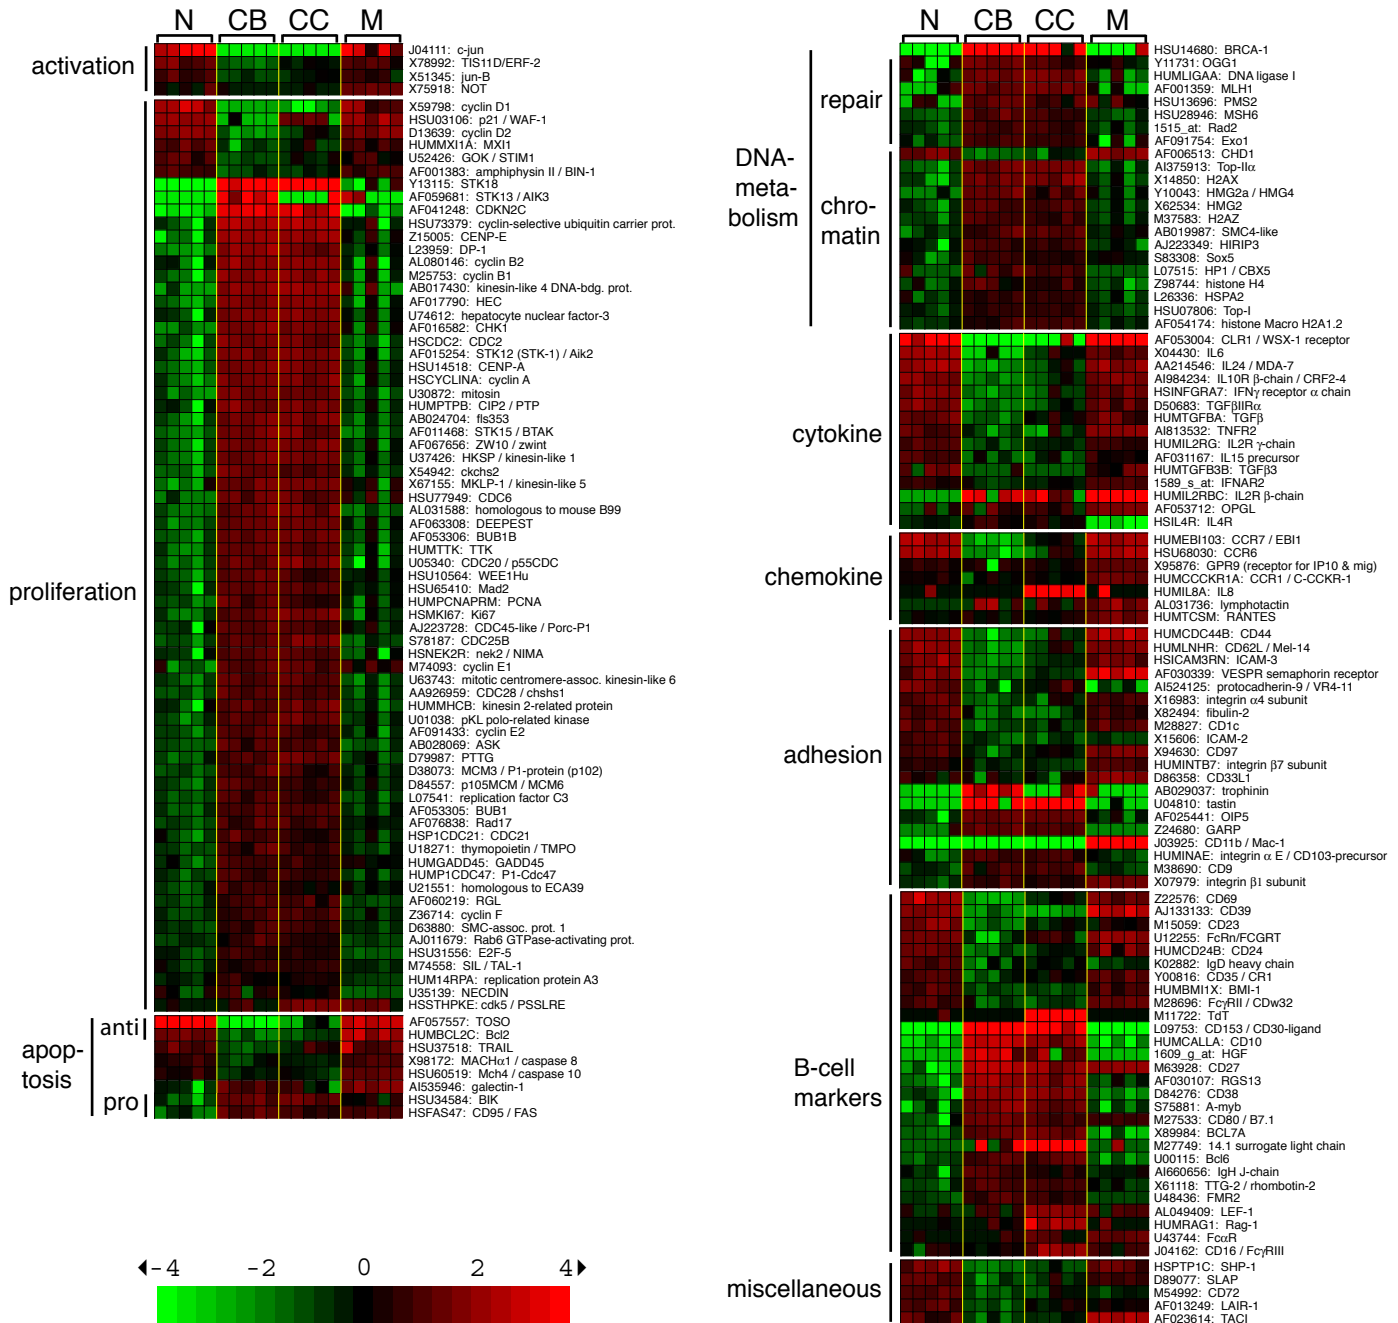

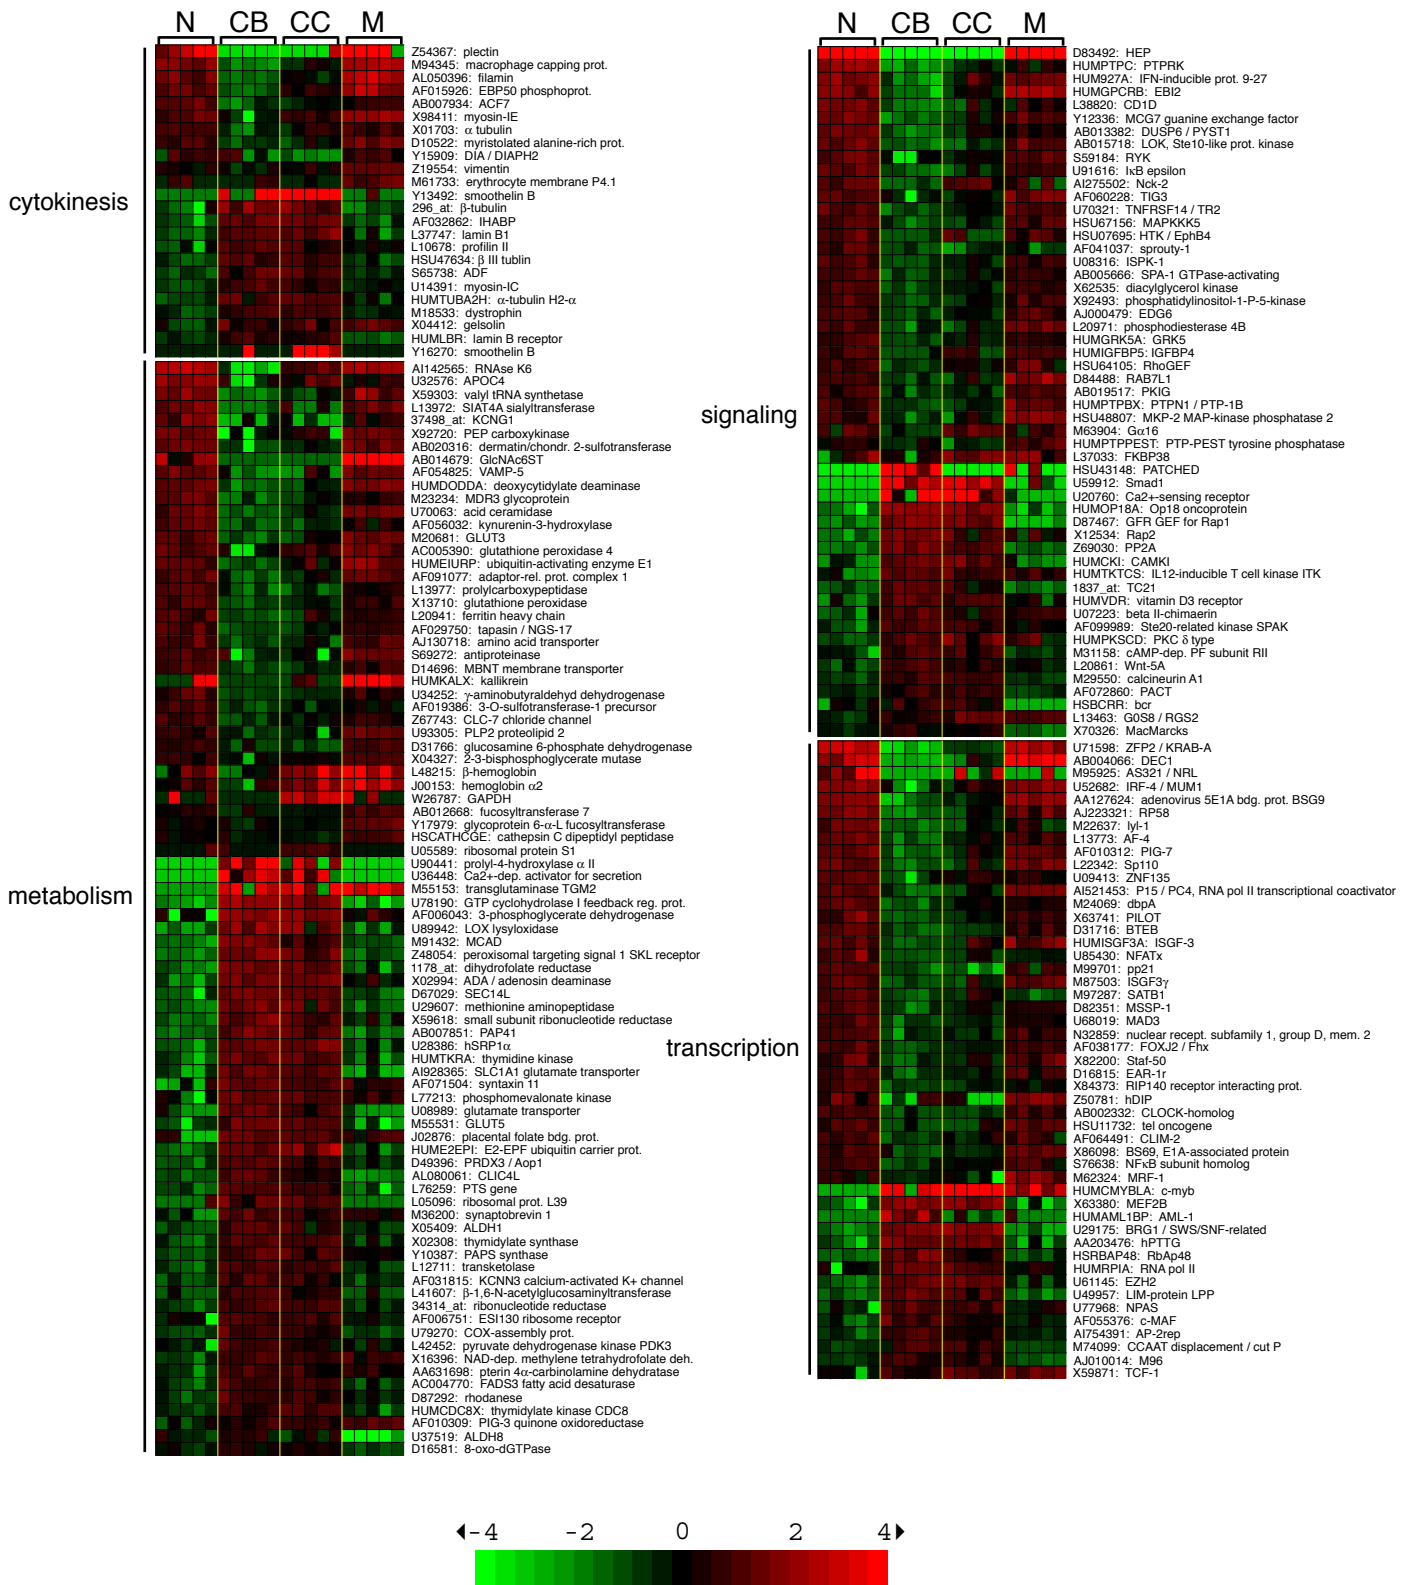

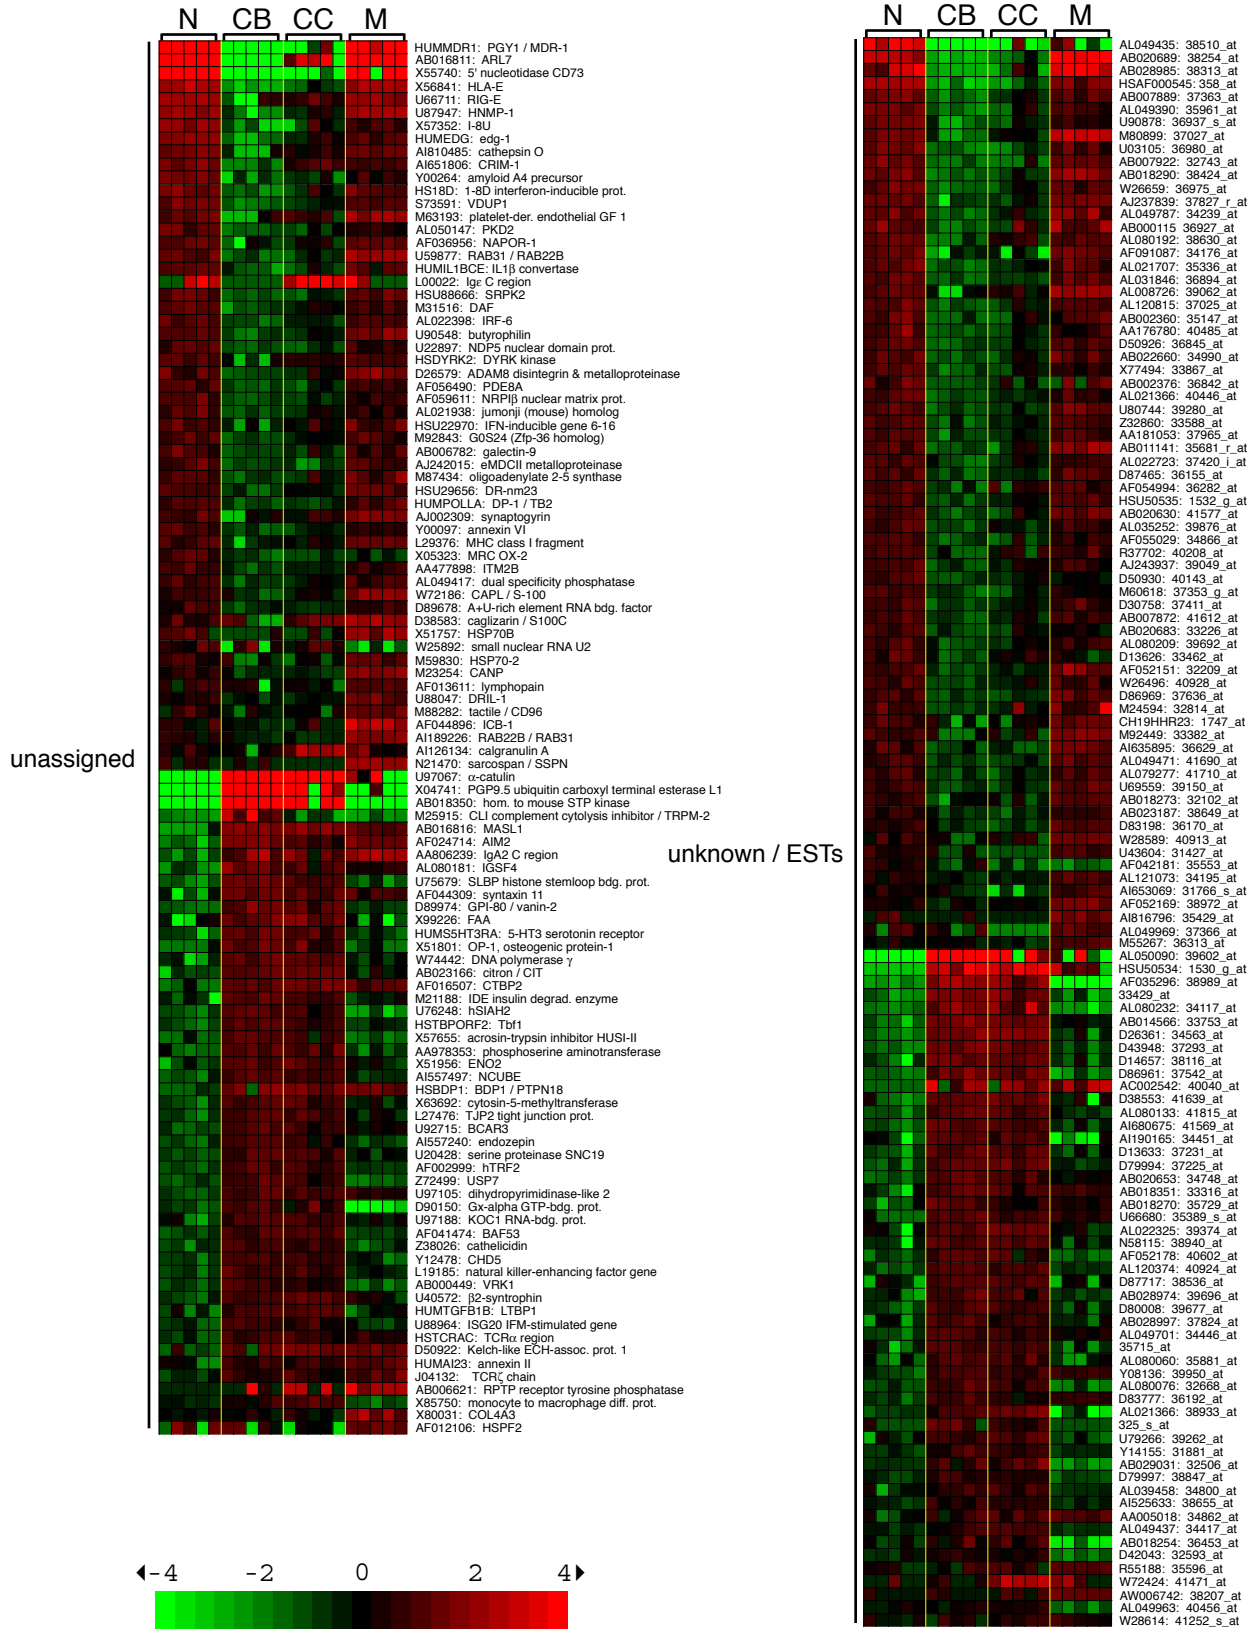

Supplement: pnas_0437996100_8.pdf [file pnas_0437996100_8.pdf]
